# Supplementary material for: Dynamics-based estimates of decline trend with fine temporal variations in China's PM 2.5 emissions
Source: Copernicus journal article supplement (doi:10.5194/acp-23-14505-2023), 2023-11-24
Supplement: Supplementary file 1 [file acp-23-14505-2023-supplement.pdf]

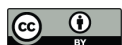

*Supplement of*

## **Dynamics-based estimates of decline trend with fine temporal variations in China's PM<sub>2.5</sub> emissions**

**Zhen Peng et al.**

*Correspondence to:* Zhe-Min Tan (zmtan@nju.edu.cn) and Meigen Zhang (mgzhang@mail.iap.ac.cn)

The copyright of individual parts of the supplement might differ from the article licence.

## 1 **Supplementary Information**

### 2 **Effects of meteorology**

3 An observing system simulation experiment (OSSE) is performed to investigate the effects of time-  
4 varying boundary layer. A nature run is first conducted from 0000 UTC 25 December 2015 to  
5 0000 UTC 2 February 2016, forced by the time-invariant source emissions PR2010 (the true  
6 emission). Synthetic observations of the six conventional air pollutant concentrations (i.e., PM<sub>10</sub>,  
7 PM<sub>2.5</sub>, SO<sub>2</sub>, NO<sub>2</sub>, O<sub>3</sub>, and CO) are generated from the natural run. Hourly synthetic observations  
8 are created from 0000 UTC 29 December 2015 to 0006 UTC 1 February 2016, by interpolating  
9 the gridded true surface concentrations to the chemical observation locations with additive random  
10 errors of  $N(0, R)$ .  $R$  is the observation error variance, which is calculated by the formula in Elbern  
11 et al. (2007). Outputs from the first four days of the natural run are excluded to avoid the transient  
12 effect. Then the prior emissions are generated by  $\mathbf{F}^{pr} = (1.8 + \delta(x, y, z, t))\mathbf{F}^{tr}$ , where  $\mathbf{F}^{tr}$  is the  
13 true emission,  $\delta$  is a random number sampled from the normal distribution  $N(0,1)$  (Peng et al.  
14 2015). Ensemble data assimilation experiments are conducted from 0000 UTC 29 December to  
15 0006 UTC 1 February 2016. Outputs from the first two days of the OSSE are excluded due to the  
16 spin-up.

17 The magnitude of posterior PM<sub>2.5</sub> emission is closer to the true emission than the prior. Figure S1  
18 presents the monthly mean diurnal variations of PM<sub>2.5</sub> emission fraction from the OSSE. It shows  
19 that a little larger estimated PM<sub>2.5</sub> emission fractions occurred in the morning and smaller  
20 estimated PM<sub>2.5</sub> emission fractions occurred in the afternoon, comparing to the time-invariant true  
21 emission. But the diurnal variations of PM<sub>2.5</sub> emission fractions caused by the boundary layer are  
22 not as strong as that caused by the emission itself (Figure 7). The reason may be that we have  
23 hourly assimilated observations to simultaneously update the chemical concentrations and source  
24 emissions. Therefore, the impacts of time-varying boundary layer on the posterior PM<sub>2.5</sub> emissions  
25 are limited.

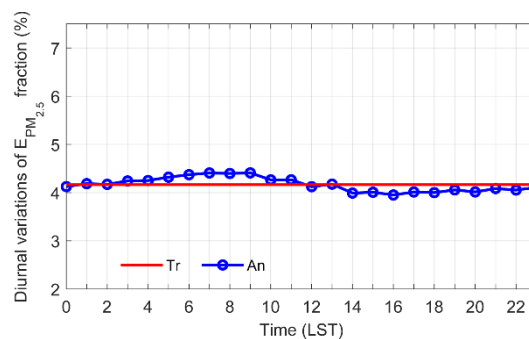

26

27 **Figure S1.** Diurnal variations of PM<sub>2.5</sub> emission fraction for the Observing System Simulation  
28 Experiment.
